# Supplementary material
Source: PubMed Central journal article supplement (PMC3545796)
Supplement: 1213214110_pnas.201213214SI.pdf [file 1213214110_pnas.201213214SI.pdf]

# Supporting Information

Dermauw et al. 10.1073/pnas.1213214110

## SI Materials and Methods

**Microarray Construction.** A custom Sureprint genome-wide G3 Gene Expression 8 × 60K microarray was designed using the Agilent eArray platform (Agilent Technologies) based on the *T. urticae* genome annotation (version from April 20, 2010). The probe design aimed for three probes of 60 nt per gene with a  $T_m$  of 80 °C and parameters set to “best probe design” and “3’ bias”. To also design gene-specific probes for highly similar genes (e.g., duplicated genes), coding sequences were extended with 100 bp of their predicted 3’-UTR. Where 3’-UTRs were not predicted or predicted to be shorter, 100 bp downstream the stop codon were added to the coding sequence. In total 58,985 probes were designed. Before the start of GeneSpring analysis (see below), probes were remapped [using Bowtie, version 0.12.7 (1)] on the most recent genome annotation (April 18, 2011; 18,455 predicted genes). According to this mapping, 87.4% from the latter were covered by at least one probe, whereas 81.7% were covered by at least three probes. Standard Agilent features such as spike-ins were added (IS-62976-8-V2\_60kby8\_GX\_EQC\_20100210). We selected 182 unique probes that mapped to *T. urticae* genes expressed across four developmental stages, as identified by RNAseq experiments (2), with different ranges of expression [based on normalized read counts (rpkm)]. These probes (probe names starting with “Rep”) were randomly distributed in 10–15 copies per array and were used to measure array reproducibility. The array design was submitted to the National Center for Biotechnology Information (NCBI) under the Gene Expression Omnibus (GEO)-platform format (GPL15756).

**Target Preparation, Microarray Hybridization, and Analysis.** Total RNA was extracted from one hundred 1- to 3-d-old adult female mites, using the RNeasy mini kit (Qiagen), in four to six replicates for each strain (MR-VP, MAR-AB, and London) or for each time point (Tomato-2h, Tomato-12h, and Tomato-5G) in the host change experiment. Contaminating DNA was removed by digestion with RNase-free Turbo DNase (Ambion). The quality and quantity of the RNA were assessed by a NanoDrop ND-1000 spectrophotometer (NanoDrop Technologies) and by running an aliquot on a 1% agarose gel. One hundred nanograms of RNA was used to generate Cy3- and Cy5-labeled cRNA, using the Agilent Low-Input Quick Amp Labeling Kit (version 6.5; Agilent Technologies). RNA spike-in controls (Agilent Technologies) were added to RNA samples before cRNA synthesis. The labeled cRNA was purified with the RNeasy mini kit (Qiagen), and dye content (>8.0 pmol dye per microgram cRNA) and the concentration of cRNA were measured by a NanoDrop ND-1000 spectrophotometer (NanoDrop Technologies). Cy3- and Cy5-labeled cRNAs were pooled and hybridized using the Gene Expression Hybridization Kit (Agilent Technologies) for 17 h in a rotating hybridization oven at 20 rpm and 65 °C. The following hybridization experiments were performed (the number of biological replicates is given in brackets): Cy5-labeled MR-VP cRNA/Cy3-labeled London cRNA [6], Cy5-labeled MAR-AB cRNA/Cy3-labeled London cRNA [5], Cy5-labeled Tomato-2h cRNA/Cy3-labeled London cRNA [4], Cy5-labeled Tomato-12h cRNA/Cy3-labeled London cRNA [4], and Cy5-labeled Tomato-5G cRNA/Cy3-labeled London cRNA [4]. After hybridization, slides were washed using the Gene Expression Wash Buffer kit (Agilent Technologies), treated with stabilization and drying solution (Agilent Technologies), and protected by an ozone-barrier cover (Agilent Technologies) until scanned by an Agilent Microarray High-Resolution Scanner with default settings for

8 × 60K G3 microarrays. Data were then normalized by the Agilent Feature Extraction software version 10.5 (Agilent Technologies) with default parameter settings for gene expression two-color microarrays (protocol GE2\_105\_Dec08) and data were transferred to GeneSpring GX 11.0 software (Agilent Technologies) for further statistical evaluation. Experiments were constructed from these microarray data with GeneSpring GX 11.0. Next, probes were flag filtered (only probes that had flag-value “present” in 50% of all replicates of each experiment were retained) and linked to the most recent annotation file (April 18, 2011), using the “Create New Gene-Level Experiment” option. Genes that showed a more than twofold change were selected for a *t*-test *P* value (false discovery rate <5% as assessed with the Benjamini–Hochberg correction for multiple testing). All our microarray datasets are accessible through the GEO series accession no. GSE39869.

**Microarray Validation by qPCR.** Microarray validation by quantitative real-time PCR (qPCR) was performed for 10 differentially expressed genes [*CYP392A16* (*tetur06g04520*), *CYP392D2* (*tetur03g04990*), *CYP392D8* (*tetur03g05070*), *CYP392D10* (*tetur03g05110*), *tetur02g09840* (glycosyltransferase), *tetur16g03200* [major facilitator superfamily (MFS) transporter], *tetur13g04550*, *tetur01g00490* [intraidiol ring-cleavage dioxygenase (ID-RCD)], *TuGStD14* (*tetur29g00220*), and *tetur06g04970* (short chain reductase)] of the susceptible London strain and both resistant strains (MR-VP and MAR-AB). To further validate the biological importance of genes identified by microarray experiments, the expression levels of these 10 differentially expressed genes were also determined for a second independent susceptible strain (LS-VL). Mite selection, culture conditions, RNA isolation, and DNase treatment were performed as previously described for microarray experiments. First-strand cDNA was synthesized from 2 µg of total RNA, using the Maxima first-strand cDNA synthesis kit (Fermentas). Real-time PCR was done on an Mx3000p real-time PCR system (Stratagene), using Maxima SYBR green qPCR Master Mix (Fermentas) with two to three biological replicates and three technical replicates for each gene. Gene-specific primers for the 10 differentially expressed genes and 2 housekeeping genes (actin, ribosomal protein 49) were designed using Primer 3 software (3) (Table S6, primer names with “q” suffix). Relative levels of expression were calculated according to Pfaffl et al. (4).

**OrthoMCL Clustering.** For gene clustering, the OrthoMCL (5) software version 2.0 with parameters (-v all -te 2 -scheme 7 -I 1.7) was applied with the species combination *Drosophila melanogaster*, *Tribolium castaneum*, *Acyrtosiphon pisum*, *Tetranychus urticae*, *Caenorhabditis elegans*, and *Homo sapiens*. In this analysis, a total of 103,935 sequences clustered into 13,876 gene families (76,810 genes in clusters; 27,125 singletons). Of these, 3,069 clusters contained sequences from all six genomes. Of the protein-coding genes predicted for *T. urticae*, 11,831 were clustered in a total of 6,098 groups. OrthoMCL uses a Markov clustering algorithm on a precalculated sequence similarity matrix to group (putative) orthologs and paralogs (6). The matrix was built on the basis of an all-against-all BLASTp (7) (2.2.24+; default parameters) and filtered according to the OrthoMCL manual. Where predicted, splice variants were removed from the dataset (the longest protein sequence prediction was withheld). OrthoMCL clustering results of *T. urticae* proteins can be accessed at the BOGAS website (<http://bioinformatics.psb.ugent.be/webtools/bogas/>).

**Signal Peptide Prediction.** The presence of a signal peptide in all protein sequences investigated in this study was predicted with SignalP 3.0 (8), using hidden Markov models (HMMs) and neural networks (NNs). Protein sequences were considered to have a signal peptide under the condition that both models predicted a signal peptide.

**Gene Family Analysis. ID-RCDs.** Gene-specific *T. urticae* ID-RCD primers (Table S6, primers with “s” suffix) were designed [using Primer 3 software (3)] to amplify a 600- to 850-bp fragment of ID-RCDs of the closely related spider mite *T. evansi*. *T. evansi* genomic DNA was extracted using a phenol chloroform extraction method as described by Khajehali et al. (9). PCRs were performed in 50- $\mu$ L reaction volumes with 38.7  $\mu$ L distilled water; 5  $\mu$ L 10 $\times$  PCR buffer, 2 mM MgCl<sub>2</sub>, 0.2 mM dNTP, and 0.2  $\mu$ M of each primer; and 2  $\mu$ L of template DNA ( $\pm$ 100 ng/ $\mu$ L) and 0.3  $\mu$ L of Taq polymerase (Invitrogen); and run on a Biometra Thermocycler Professional (Westburg). PCR conditions were as follows: 2 min at 94  $^{\circ}$ C, 35  $\times$  (20 s at 94  $^{\circ}$ C, 55 s at 49  $^{\circ}$ C, 2 min at 72  $^{\circ}$ C), and 5 min at 72  $^{\circ}$ C. All PCR products were separated by electrophoresis on a 1% agarose gel and visualized by ethidium bromide staining. Subsequently, PCR products were purified with the Cycle Pure Kit (Omega Bio-Tek) and cloned into the pJET1.2/blunt vector (Fermentas). After heat-shock transformation of *Escherichia coli* (DH5 $\alpha$ ) cells, plasmid DNA was obtained by miniprep [using the Plasmid Mini Kit (Omega Bio-Tek)] and inserted fragments were sequenced with pJET1.2F and pJET1.2R primers by LGC Genomics. Sequences were deposited in the GenBank database (GenBank accession nos. JQ736355–JQ736359).

The presence of ID-RCDs in *Panonychus citri*, *Metaseiulus occidentalis*, *Varroa destructor*, and *Ixodes scapularis* was determined through a tBLASTn search (7) of *T. urticae* ID-RCD protein sequences against the published transcriptome dataset of *P. citri* [European Molecular Biology Laboratory–European Bioinformatics Institute (EMBL–EBI) accession no. ERP000885], the genome of *M. occidentalis* (Mocc 1.0 assembly), the genome of *V. destructor* (BRL Vdes 1.0 assembly), and the genome of *I. scapularis* (ASM20861v1 assembly).

All protein sequences of *T. urticae* ID-RCDs (2) were used as queries in BLASTp (cutoff  $E$ -value  $\leq e^{-10}$ ) searches of the NCBI nonredundant protein database. This resulted in 280 unique hits with a protein length between 176 and 500 aa. In the dataset obtained, four genera were overrepresented, namely *Aspergillus* (48 sequences), *Streptomyces* (36 sequences), *Rhodococcus* (12 sequences), and *Rhizobium* (9 sequences). All redundant amino acid sequences from these genera were removed for further analysis. Of the resulting 213 protein sequences, 191 were recognized by the Conserved Domain Database (10) as members of the intradiol dioxygenase-like subgroup (cd03457) and 22 sequences as members of the intradiol dioxygenase superfamily (cl01383). Next, 19 functionally characterized (“classical”) intradiol dioxygenases (cd03459–cd03464), belonging to bacteria and fungi, were

added to the dataset. Finally, 17 *T. urticae* ID-RCDs and five *T. evansi* homologs (see above) were incorporated into the analysis (see Table S1 for GenBank accession numbers). The amino acid sequence alignment was constructed using MUSCLE (11). Model selection was done with ProtTest 2.4 (12) and according to the Akaike information criterion the model WAG+I+G+F was optimum for phylogenetic analysis. Finally, a maximum-likelihood analysis was performed using Treefinder (13), bootstrapping with 1,000 pseudoreplicates (LR-ELW). Phylogenetic trees were visualized and edited using MEGA5 (14) and CorelDraw X3 (Corel), respectively.

**Lipocalins.** Pfam domain searches of our microarray gene expression data revealed that several significantly up- and down-regulated genes contained the lipocalin signature (PF08212.7, PF00061.18). Protein sequences of these genes were used as queries in BLASTp searches (7) of the NCBI nonredundant protein database. Each BLASTp search resulted mainly in hits with the highest bitscore for apolipoprotein D proteins of mammals. Next, a reference apolipoprotein D-protein sequence of *Homo sapiens* (GenBank accession no. P05090) was used as a query in BLASTp (cutoff  $E$ -value  $\leq e^{-5}$ ) against the proteome of *T. urticae* at the BOGAS website (<http://bioinformatics.psb.ugent.be/webtools/bogas/>). Finally, the resulting hits were used as a query in BLASTp (cutoff  $E$ -value  $\leq e^{-5}$ ) against the proteome of *T. urticae*. Using this approach we identified 67 lipocalin candidates. Pseudogenes and gene fragments were separated from putative full-length lipocalins (58, grouped via OrthoMCL into clusters 10134, 10107, 19721, 19288, and 21421; Table S2). The latter were together with a selected reference dataset of lipocalin genes (15) (see Table S3 for GenBank accession numbers) aligned using the profile alignment mode of Clustal X and the alignment of Sanchez et al. (16) as a profile (17). Tick lipocalin protein sequences were not included in our phylogenetic analysis to decrease the risk of long-branching artifacts (15). Model selection was performed with ProtTest 2.4 (12) and according to the Akaike information criterion the model WAG+G+F was optimum for phylogenetic analysis. Finally, a maximum-likelihood analysis was performed using Treefinder (13), bootstrapping with 500 pseudoreplicates (LR-ELW). Phylogenetic trees were visualized and edited using MEGA5 (14) and CorelDraw X3 (Corel), respectively. Secondary structures of *T. urticae* lipocalins were predicted using Jpred 3 (18) whereas GPI-anchor sites were predicted using PredGPI (19).

**MFS transporters.** Pfam domain searches of our microarray expression data revealed the up- and down-regulation of genes containing the MFS signature (PF07690.11). Most differentially expressed MFS genes grouped into three OrthoMCL clusters: 10032, 10082, and 10236. To determine the MFS class of genes in these clusters, protein sequences were used as a query in BLASTp in the Transporter Classification DataBase (20) (Table S4). Transmembrane regions were predicted using TMHMM Server v. 2.0. (<http://www.cbs.dtu.dk/services/TMHMM/>).

- Langmead B, Trapnell C, Pop M, Salzberg SL (2009) Ultrafast and memory-efficient alignment of short DNA sequences to the human genome. *Genome Biol* 10(3):R25.
- Grbić M, et al. (2011) The genome of *Tetranychus urticae* reveals herbivorous pest adaptations. *Nature* 479(7374):487–492.
- Rozen S, Skaletsky HJ (2000) *Bioinformatics Methods and Protocols: Methods in Molecular Biology*, eds Krawetz S, Misener S (Humana Press, Totowa, NJ), pp 365–386.
- Pfaffl MW (2001) A new mathematical model for relative quantification in real-time RT-PCR. *Nucleic Acids Res* 29(9):e45.
- Van Dongen S (2000) Graph clustering by flow simulation. PhD thesis (Univ of Utrecht, Utrecht, The Netherlands).
- Li L, Stoeckert CJ, Jr., Roos DS (2003) OrthoMCL: Identification of ortholog groups for eukaryotic genomes. *Genome Res* 13(9):2178–2189.
- Altschul SF, Gish W, Miller W, Myers EW, Lipman DJ (1990) Basic local alignment search tool. *J Mol Biol* 215(3):403–410.
- Bendtsen JD, Nielsen H, von Heijne G, Brunak S (2004) Improved prediction of signal peptides: SignalP 3.0. *J Mol Biol* 340(4):783–795.
- Khajehali J, Van Nieuwenhuyse P, Demaeht P, Tirry L, Van Leeuwen T (2011) Acaricide resistance and resistance mechanisms in *Tetranychus urticae* populations from rose greenhouses in the Netherlands. *Pest Manag Sci* 67(11):1424–1433.
- Marchler-Bauer A, et al. (2011) CDD: A Conserved Domain Database for the functional annotation of proteins. *Nucleic Acids Res* 39(Database issue):D225–D229.
- Edgar RC (2004) MUSCLE: Multiple sequence alignment with high accuracy and high throughput. *Nucleic Acids Res* 32(5):1792–1797.
- Abascal F, Zardoya R, Posada D (2005) ProtTest: Selection of best-fit models of protein evolution. *Bioinformatics* 21(9):2104–2105.
- Jobb G, von Haeseler A, Strimmer K (2004) TREEFINDER: A powerful graphical analysis environment for molecular phylogenetics. *BMC Evol Biol* 4:18.
- Tamura K, et al. (2011) MEGA5: Molecular evolutionary genetics analysis using maximum likelihood, evolutionary distance, and maximum parsimony methods. *Mol Biol Evol* 28(10):2731–2739.
- Ganfornina MD, Kayser H, Sanchez D (2006) *Lipocalins*, eds Åkerström B, Borregaard N, Flower DR, Salier JP (Landes Bioscience, Austin, TX), pp 49–74.

16. Sánchez D, Ganfornina MD, Gutiérrez G, Marín A (2003) Exon-intron structure and evolution of the Lipocalin gene family. *Mol Biol Evol* 20(5):775–783.
17. Anderson CL, Strope CL, Moriyama EN (2011) SuiteMSA: Visual tools for multiple sequence alignment comparison and molecular sequence simulation. *BMC Bioinformatics* 12:184.
18. Cole C, Barber JD, Barton GJ (2008) The Jpred 3 secondary structure prediction server. *Nucleic Acids Res* 36(Web Server issue):W197–W201.
19. Pierleoni A, Martelli PL, Casadio R (2008) PredGPI: A GPI-anchor predictor. *BMC Bioinformatics* 9:392.
20. Saier MH, Jr., Yen MR, Noto K, Tamang DG, Elkan C (2009) The Transporter Classification Database: Recent advances. *Nucleic Acids Res* 37(Database issue): D274–D278.

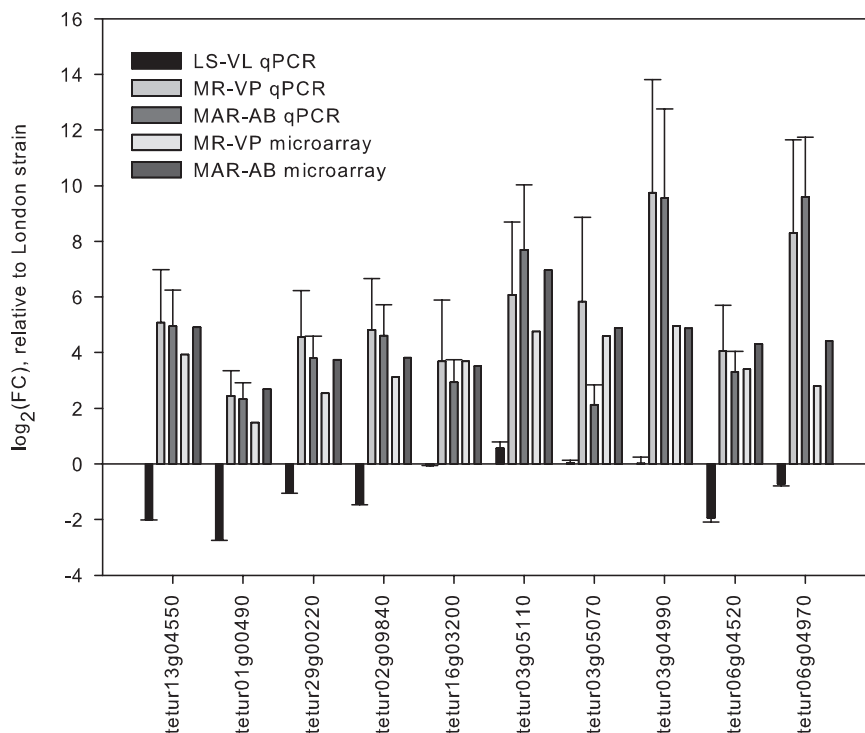

**Fig. S1.** Microarray validation by quantitative real-time PCR. Validation was performed for 10 differentially expressed genes [*CYP392A16* (*tetur06g04520*), *CYP392D2* (*tetur03g04990*), *CYP392D8* (*tetur03g05070*), *CYP392D10* (*tetur03g05110*), *tetur02g09840* (glycosyltransferase), *tetur16g03200* (MFS transporter), *tetur13g04550*, *tetur01g00490* (ID-RCDs), *TuGSTd14* (*tetur29g00220*), and *tetur06g04970* (short chain reductase)] for two susceptible strains (London and LS-VL) and both resistant strains (MR-VP and MAR-AB). Error bars represent the SE of the calculated mean based on three biological replicates. Microarray expression data (MR-VP and MAR-AB, microarray) from this selection of genes are shown next to their qPCR expression data.

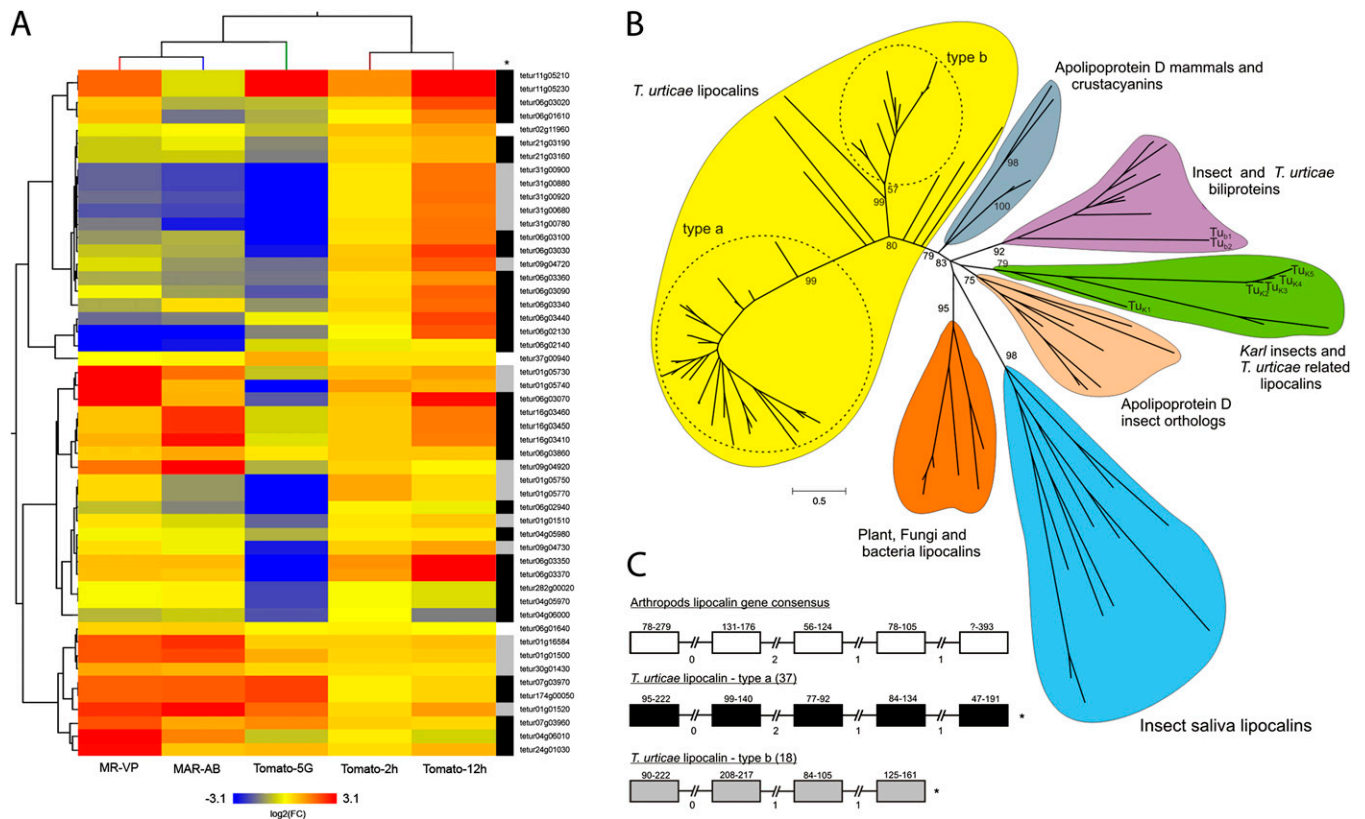

**Fig. S2.** Lipocalins in *T. urticae*. (A) Clustering of lipocalin gene expression between conditions [MAR-AB, MR-VP, and host change (Tomato-2h, Tomato-12h, and Tomato-5G)] reveals correlation of expression levels. Clustering was performed in GeneSpring GX11.0, using the hierarchical clustering algorithm with Pearson's centered distance metric and complete linkage rule. The color bar with corresponding  $\log_2(\text{FC})$  values is shown at the bottom. The bar under the asterisk indicates the number and phases of introns of each *T. urticae* lipocalin (as explained in C: black, type a; gray, type b; white, neither type a nor type b). (B) Maximum-likelihood unrooted tree depicting the phylogenetic relationship of the expanded (58 genes) lipocalin family of *T. urticae*. Most of *T. urticae* lipocalins cluster with mammalian Apolipoprotein D and crustacyanins. *T. urticae* homologs of insect biliproteins and Karl of *D. melanogaster* are indicated as  $Tu_{b1}$  (tetur07g03790),  $Tu_{b2}$  (tetur174g00050) and  $Tu_{K1}$  (tetur02g11960),  $Tu_{K2}$  (tetur01g01510),  $Tu_{K3}$  (tetur01g01500),  $Tu_{K4}$  (tetur01g16584), and  $Tu_{K5}$  (tetur01g01520), respectively. Members within two subclades of the *T. urticae* lipocalins have similar numbers and phases of introns (type a or b, see C) and are depicted by circles. The highly divergent tick lipocalin protein sequences were not included in our phylogenetic analysis to decrease the risk of long-branch artifacts (1). (C) Comparison of lipocalin gene structure consensus between arthropods (2) and *T. urticae*, revealing a new *T. urticae* gene structure (type b). Square boxes (not drawn to scale) represent exons. Numbers above boxes represent the exon size range (bp) while numbers between boxes represent intron phases.

1. Ganfornina MD, Kayser H, Sanchez D (2006) *Lipocalins*, eds Åkerström B, Borregaard N, Flower DR, Salier JP (Landes Bioscience, Austin, TX), pp 49–74.
2. Sanchez D, et al. (2006) *Lipocalins*, eds Åkerström B, Borregaard N, Flower DR, Salier JP (Landes Bioscience, Austin, TX), pp 5–16.



**Table S1. GenBank accession numbers of ID-RCDs used for phylogenetic analysis**

| Genus*                                                                                  | Accession no.† | S <sub>p</sub> ‡ | Genus*                    | Accession no.† | S <sub>p</sub> ‡ | Genus*                    | Accession no.† | S <sub>p</sub> ‡ |
|-----------------------------------------------------------------------------------------|----------------|------------------|---------------------------|----------------|------------------|---------------------------|----------------|------------------|
| <i>Tetranychus</i> sp. ID-RCDs                                                          |                |                  |                           |                |                  |                           |                |                  |
| <i>Tetranychus urticae</i>                                                              | tetur01g00490  | Y                | <i>T. urticae</i>         | tetur07g05940  | Y                | <i>T. urticae</i>         | tetur20g01790  | Y                |
| <i>T. urticae</i>                                                                       | tetur04g00150  | Y                | <i>T. urticae</i>         | tetur07g06560  | Y                | <i>T. urticae</i>         | tetur28g01250  | Y                |
| <i>T. urticae</i>                                                                       | tetur04g08620  | Y                | <i>T. urticae</i>         | tetur12g04761  | Y                | <i>T. urticae</i>         | tetur44g00140  | Y                |
| <i>T. urticae</i>                                                                       | tetur06g00450  | Y                | <i>T. urticae</i>         | tetur13g04550  | Y                | <i>Tetranychus evansi</i> | JQ736355       |                  |
| <i>T. urticae</i>                                                                       | tetur06g00460  | Y                | <i>T. urticae</i>         | tetur19g02300  | Y                | <i>T. evansi</i>          | JQ736356       |                  |
| <i>T. urticae</i>                                                                       | tetur07g02040  | Y                | <i>T. urticae</i>         | tetur19g03360  | Y                | <i>T. evansi</i>          | JQ736357       |                  |
| <i>T. urticae</i>                                                                       | tetur07g05930  | Y                | <i>T. urticae</i>         | tetur20g01160  | Y                | <i>T. evansi</i>          | JQ736358       |                  |
|                                                                                         |                |                  |                           |                |                  | <i>T. evansi</i>          | JQ736359       |                  |
| "Classical" ID-RCDs                                                                     |                |                  |                           |                |                  |                           |                |                  |
| <i>Acinetobacter</i>                                                                    | Q1WCN0         | N                | <i>Chelativorans</i>      | Q11GN2         | N                | <i>Pyrenophora</i>        | B2WPE2         | N                |
| <i>Agrobacterium</i>                                                                    | Q7CV76         | N                | <i>Escherichia</i>        | B7LQX6         | N                | <i>Ralstonia</i>          | Q0KAA6         | N                |
| <i>Ajellomyces</i>                                                                      | C5JTU1         | N                | <i>Jannaschia</i>         | Q28JN2         | N                | <i>Rhodococcus</i>        | Q6F4M7         | N                |
| <i>Arthrobacter</i>                                                                     | A1RBV0         | N                | <i>Pandoraea</i>          | A7KX07         | N                | <i>Streptomyces</i>       | Q9APK9         | N                |
| <i>Arthrobacter</i>                                                                     | Q76CC4         | N                | <i>Paracoccidioides</i>   | C1GHP3         | N                | <i>Talaromyces</i>        | B8M1V8         | N                |
| <i>Aspergillus</i>                                                                      | B8NN75         | N                | <i>Pseudomonas</i>        | A6V876         | N                |                           |                |                  |
| <i>Candidatus</i>                                                                       | Q02CF8         | N                | <i>Pyrenophora</i>        | B2VWY2         | N                |                           |                |                  |
| NCBI BLASTp hits ( $E$ -value $\leq e^{-10}$ ) using <i>T. urticae</i> ID-RCDs as query |                |                  |                           |                |                  |                           |                |                  |
| <i>Acaryochloris</i>                                                                    | YP_001515498   | N                | <i>Frankia</i>            | YP_479231      | N                | <i>Phytophthora</i>       | XP_002905783   | Y                |
| <i>Acidobacterium</i>                                                                   | ZP_07065922    | Y                | <i>Frankia</i>            | YP_001508082   | N                | <i>Podospira</i>          | CAP65306       | Y                |
| <i>Acidobacterium</i>                                                                   | ZP_07648583    | N                | <i>Frankia</i>            | YP_001508663   | N                | <i>Podospira</i>          | XP_001903249   | Y                |
| <i>Actinosynnema</i>                                                                    | YP_003100310   | N                | <i>Frankia</i>            | YP_004019605   | N                | <i>Pseudomonas</i>        | YP_350088      | N                |
| <i>Actinosynnema</i>                                                                    | YP_003100966   | N                | <i>Frankia</i>            | ZP_06410955    | N                | <i>Puccinia</i>           | EFP84436       | Y                |
| <i>Ajellomyces</i>                                                                      | EEH02815       | Y                | <i>Frankia</i>            | ZP_06475430    | N                | <i>Pyrenophora</i>        | EFQ91909       | Y                |
| <i>Ajellomyces</i>                                                                      | EER41332       | Y                | <i>Fulvimarina</i>        | ZP_01438862    | Y                | <i>Pyrenophora</i>        | XP_001940623   | Y                |
| <i>Ajellomyces</i>                                                                      | EEQ89061       | Y                | <i>Gemmatimonas</i>       | YP_002762722   | N                | <i>Ralstonia</i>          | YP_728952      | N                |
| <i>Alteromonas</i>                                                                      | ZP_04713930    | N                | <i>Gibberella</i>         | XP_382158      | Y                | <i>Ralstonia</i>          | YP_299431      | N                |
| <i>Amycolatopsis</i>                                                                    | YP_003765631   | Y                | <i>Gibberella</i>         | XP_384861      | Y                | <i>Rhizobium</i>          | ZP_03505301    | Y                |
| <i>Arthrobacter</i>                                                                     | YP_949837      | Y                | <i>Gibberella</i>         | XP_388213      | Y                | <i>Rhizobium</i>          | YP_470103      | Y                |
| <i>Arthrobacter</i>                                                                     | YP_002489952   | N                | <i>Glomerella</i>         | EFQ27291       | Y                | <i>Rhizobium</i>          | YP_001978859   | Y                |
| <i>Arthrobacter</i>                                                                     | YP_833604      | Y                | <i>Glomerella</i>         | EFQ34262       | N                | <i>Rhizobium</i>          | ZP_03530195    | Y                |
| <i>Aspergillus</i>                                                                      | CBF87292       | N                | <i>Glomerella</i>         | EFQ35214       | Y                | <i>Rhizobium</i>          | ZP_03524635    | N                |
| <i>Aspergillus</i>                                                                      | XP_658905      | Y                | <i>Haloferax</i>          | YP_003536123   | N                | <i>Rhodococcus</i>        | YP_004008885   | Y                |
| <i>Aspergillus</i>                                                                      | XP_661807      | Y                | <i>Herpetosiphon</i>      | YP_001546287   | Y                | <i>Rhodococcus</i>        | YP_004008886   | Y                |
| <i>Aspergillus</i>                                                                      | XP_662932      | Y                | <i>Herpetosiphon</i>      | YP_001547597   | N                | <i>Rhodococcus</i>        | ZP_06830704    | Y                |
| <i>Aspergillus</i>                                                                      | XP_663002      | Y                | <i>Hyphomicrobium</i>     | YP_003756407   | N                | <i>Rhodococcus</i>        | ZP_06830705    | Y                |
| <i>Aspergillus</i>                                                                      | XP_664765      | Y                | <i>Janibacter</i>         | ZP_00995526    | N                | <i>Rhodococcus</i>        | AAN37493       | N                |
| <i>Aspergillus</i>                                                                      | XP_001389482   | N                | <i>Janibacter</i>         | ZP_00995926    | N                | <i>Rhodococcus</i>        | AAR27826       | Y                |
| <i>Aspergillus</i>                                                                      | XP_001389508   | Y                | <i>Ketogulonicigenium</i> | YP_003964856   | Y                | <i>Riemerella</i>         | YP_004044931   | N                |
| <i>Aspergillus</i>                                                                      | XP_001390849   | Y                | <i>Kineococcus</i>        | YP_001363667   | N                | <i>Roseibium</i>          | ZP_07660688    | Y                |
| <i>Aspergillus</i>                                                                      | XP_001391162   | N                | <i>Kitasatospora</i>      | BAJ27524       | N                | <i>Roseiflexus</i>        | YP_001431698   | Y                |
| <i>Aspergillus</i>                                                                      | XP_001393826   | Y                | <i>Kitasatospora</i>      | BAJ31863       | N                | <i>Roseiflexus</i>        | YP_001275304   | Y                |
| <i>Aspergillus</i>                                                                      | XP_001395585   | N                | <i>Kribbella</i>          | YP_003381075   | N                | <i>Saccharopolyspora</i>  | YP_001104202   | Y                |
| <i>Aspergillus</i>                                                                      | XP_001395793   | Y                | <i>Laccaria</i>           | XP_001879555   | Y                | <i>Saccharopolyspora</i>  | YP_001105681   | Y                |
| <i>Aspergillus</i>                                                                      | XP_001396120   | Y                | <i>Limnobacter</i>        | ZP_01915839    | Y                | <i>Sanguibacter</i>       | YP_003314415   | N                |
| <i>Aspergillus</i>                                                                      | XP_001399989   | Y                | <i>Magnaporthe</i>        | XP_363006      | Y                | <i>Schistosoma</i>        | XP_002569539   | N                |
| <i>Aspergillus</i>                                                                      | CAK37271       | Y                | <i>Marinomonas</i>        | ZP_01076090    | Y                | <i>Schizophyllum</i>      | XP_003026007   | Y                |
| <i>Aspergillus</i>                                                                      | CAK40367       | Y                | <i>Maritimibacter</i>     | ZP_01013228    | Y                | <i>Schizophyllum</i>      | XP_003026084   | Y                |

Table S1. Cont.

| Genus*                  | Accession no.† | S <sub>p</sub> ‡ | Genus*                  | Accession no.† | S <sub>p</sub> ‡ | Genus*                   | Accession no.† | S <sub>p</sub> ‡ |
|-------------------------|----------------|------------------|-------------------------|----------------|------------------|--------------------------|----------------|------------------|
| <i>Aspergillus</i>      | CAK41421       | Y                | <i>Meiothermus</i>      | YP_003505838   | N                | <i>Schizophyllum</i>     | XP_003029142   | N                |
| <i>Aspergillus</i>      | CAK44937       | Y                | <i>Mesorhizobium</i>    | YP_004139576   | Y                | <i>Schizophyllum</i>     | XP_003029311   | N                |
| <i>Aspergillus</i>      | CAK46228       | Y                | <i>Mesorhizobium</i>    | YP_675384      | Y                | <i>Schizophyllum</i>     | XP_003031024   | Y                |
| <i>Asticcacaulis</i>    | YP_004087964   | N                | <i>Methylobacterium</i> | YP_002423474   | Y                | <i>Schizophyllum</i>     | XP_003035277   | N                |
| <i>Beutenbergia</i>     | YP_002880947   | N                | <i>Methylosinus</i>     | ZP_06887255    | Y                | <i>Sclerotinia</i>       | XP_001584708   | Y                |
| <i>Botryotinia</i>      | XP_001547782   | N                | <i>Methylovorus</i>     | YP_004039767   | Y                | <i>Sclerotinia</i>       | XP_001590335   | Y                |
| <i>Botryotinia</i>      | XP_001550224   | Y                | <i>Methylovorus</i>     | YP_003051066   | Y                | <i>Sinorhizobium</i>     | YP_002823995   | Y                |
| <i>Bradyrhizobium</i>   | YP_001243151   | Y                | <i>Micrococcus</i>      | YP_002956532   | N                | <i>Sinorhizobium</i>     | YP_001312810   | Y                |
| <i>Bradyrhizobium</i>   | YP_001202885   | Y                | <i>Micrococcus</i>      | ZP_06500982    | N                | <i>Sorangium</i>         | YP_001617686   | N                |
| <i>Brevibacterium</i>   | ZP_05914095    | N                | <i>Micromonospora</i>   | ZP_04603856    | N                | <i>Sorangium</i>         | YP_001617690   | N                |
| <i>Burkholderia</i>     | ZP_03270367    | N                | <i>Moniliophthora</i>   | XP_002390944   | N                | <i>Spirosoma</i>         | YP_003387063   | Y                |
| <i>Caulobacter</i>      | YP_003594737   | Y                | <i>Mucilaginibacter</i> | ZP_07746550    | Y                | <i>Stigmatella</i>       | ZP_01459590    | Y                |
| <i>Cellvibrio</i>       | YP_001983304   | N                | <i>Naegleria</i>        | XP_002681734   | Y                | <i>Streptomyces</i>      | YP_003490106   | N                |
| <i>Chaetomium</i>       | XP_001223092   | Y                | <i>Nakamurella</i>      | YP_003203127   | N                | <i>Streptomyces</i>      | YP_003490270   | Y                |
| <i>Chaetomium</i>       | XP_001224578   | Y                | <i>Nectria</i>          | XP_003040987   | Y                | <i>Streptomyces</i>      | YP_003490910   | N                |
| <i>Chaetomium</i>       | XP_001228656   | Y                | <i>Nectria</i>          | XP_003043843   | Y                | <i>Streptomyces</i>      | ZP_06275428    | N                |
| <i>Chitinophaga</i>     | YP_003120875   | Y                | <i>Nectria</i>          | XP_003047595   | Y                | <i>Streptomyces</i>      | ZP_07284524    | N                |
| <i>Chloroflexus</i>     | YP_002463143   | N                | <i>Nectria</i>          | XP_003052962   | Y                | <i>Streptomyces</i>      | ZP_07285769    | N                |
| <i>Chloroflexus</i>     | YP_001635170   | N                | <i>Neosartorya</i>      | XP_001257499   | Y                | <i>Streptomyces</i>      | ZP_06708934    | N                |
| <i>Clavibacter</i>      | YP_001221487   | N                | <i>Neosartorya</i>      | XP_001258835   | Y                | <i>Streptomyces</i>      | ZP_06712030    | N                |
| <i>Comamonas</i>        | YP_003280206   | N                | <i>Neosartorya</i>      | XP_001263001   | Y                | <i>Streptomyces</i>      | ZP_04999238    | Y                |
| <i>Comamonas</i>        | ZP_03541192    | N                | <i>Neosartorya</i>      | XP_001265559   | Y                | <i>Streptomyces</i>      | ZP_06916827    | N                |
| <i>Comamonas</i>        | ZP_07046125    | N                | <i>Neurospora</i>       | XP_963883      | Y                | <i>Streptomyces</i>      | ZP_06918248    | Y                |
| <i>Conexibacter</i>     | YP_003395019   | N                | <i>Nitrosococcus</i>    | YP_003527272   | N                | <i>Streptomyces</i>      | ZP_06918456    | N                |
| <i>Coprinopsis</i>      | XP_001831803   | Y                | <i>Nitrosococcus</i>    | YP_343162_Y    | Y                | <i>Streptomyces</i>      | ZP_06918464    | Y                |
| <i>Coprinopsis</i>      | XP_001834886   | Y                | <i>Nitrosococcus</i>    | YP_344402      | N                | <i>Streptosporangium</i> | YP_003343260   | N                |
| <i>Corynebacterium</i>  | NP_599490      | N                | <i>Nitrosospira</i>     | YP_412780      | Y                | <i>Talaromyces</i>       | XP_002478049   | Y                |
| <i>Corynebacterium</i>  | YP_001137177   | N                | <i>Nocardia</i>         | YP_120510      | N                | <i>Talaromyces</i>       | XP_002488138   | Y                |
| <i>Corynebacterium</i>  | ZP_07404061    | Y                | <i>Novosphingobium</i>  | YP_497150      | N                | <i>Thermobaculum</i>     | YP_003323670   | N                |
| <i>Corynebacterium</i>  | ZP_07990861    | N                | <i>Paracoccidioides</i> | XP_002796777   | Y                | <i>Thermus</i>           | ZP_03495684    | Y                |
| <i>Cryptococcus</i>     | XP_572061      | Y                | <i>Paracoccidioides</i> | EEH19263       | Y                | <i>Thermus</i>           | YP_005116      | N                |
| <i>Cupriavidus</i>      | YP_587403      | Y                | <i>Paracoccidioides</i> | EEH48111       | Y                | <i>Thiobacillus</i>      | YP_314960      | N                |
| <i>Cupriavidus</i>      | YP_002007309   | Y                | <i>Pectobacterium</i>   | YP_003019323   | Y                | <i>Tuber</i>             | XP_002840547   | Y                |
| <i>Debaryomyces</i>     | XP_002770542   | Y                | <i>Pelagibaca</i>       | ZP_01444072    | N                | <i>Ustilago</i>          | XP_760258      | Y                |
| <i>Deinococcus</i>      | YP_002784902   | N                | <i>Penicillium</i>      | XP_002556982   | Y                | <i>Ustilago</i>          | XP_762135      | Y                |
| <i>Deinococcus</i>      | DYP_002787243  | N                | <i>Penicillium</i>      | XP_002559399   | Y                | <i>Verticillium</i>      | XP_003005923   | Y                |
| <i>Deinococcus</i>      | YP_594344      | N                | <i>Penicillium</i>      | XP_002563845   | Y                | <i>Xenorhabdus</i>       | YP_003467843   | Y                |
| <i>Delftia</i>          | YP_001564166   | N                | <i>Phaeosphaeria</i>    | XP_001791242   | Y                | <i>Xenorhabdus</i>       | YP_003712511   | Y                |
| <i>Dyadobacter</i>      | YP_003088138   | Y                | <i>Phaeosphaeria</i>    | XP_001791707   | Y                | <i>Yersinia</i>          | NP_670676      | N                |
| <i>Flavobacteriales</i> | ZP_02181399    | Y                | <i>Photorhabdus</i>     | YP_003042719   | N                | <i>Yersinia</i>          | YP_001399705   | N                |
| <i>Flavobacterium</i>   | YP_001194031   | Y                | <i>Photorhabdus</i>     | NP_931592      | Y                | <i>Yersinia</i>          | YP_071754      | N                |

\**T. urticae* accession numbers can be accessed through the BOGAS genome portal (<http://bioinformatics.psb.ugent.be/webtools/bogas/>), other accession numbers are available at GenBank.

†Color code: bacteria, green; fungi, purple; Archaea, red; Chromalveolata, dark blue; Excavata, light blue; Animalia, yellow.

‡S<sub>p</sub>: predicted with (yes, Y) or without (no, N) a signal peptide according to SignalP 3.0 (8).

**Table S2. *T. urticae* lipocalin properties**

| Tetur ID*      | $\beta$ -strands/helices <sup>†</sup> | Intron phase pattern <sup>‡</sup> | S <sub>p</sub> <sup>§</sup> | Length, aa | Strand | OrthoMCL |
|----------------|---------------------------------------|-----------------------------------|-----------------------------|------------|--------|----------|
| tetur01g01500  | 7+1/1+1                               | 0_1_1                             | Y                           | 190        | +      | 19288    |
| tetur01g01510  | 8+1/1+1                               | 0_1_1                             | Y                           | 195        | +      | 19288    |
| tetur01g01520  | 9+1/1+1                               | 0_1_1                             | Y                           | 187        | +      | 19288    |
| tetur01g05730  | 8+1/2+1                               | 0_1_1                             | Y                           | 208        | +      | 10134    |
| tetur01g05740  | 8+1/1+1                               | 0_1_1                             | Y                           | 192        | +      | 10134    |
| tetur01g05750  | 8+1/1+1                               | 0_1_1                             | Y                           | 187        | -      | 10134    |
| tetur01g05770  | 8+1/1+1                               | 0_1_1                             | Y                           | 187        | +      | 10134    |
| tetur01g16584  | 8+1/1+1                               | 0_1_1                             | Y                           | 195        | +      | 10134    |
| tetur06g03550  | 8/1+1                                 | 0_1_1                             | Y                           | 192        | +      | 10134    |
| tetur09g04720  | 8+1/1+1                               | 0_1_1                             | Y                           | 198        | +      | 10134    |
| tetur09g04730  | 8+1/1+1                               | 0_1_1                             | Y                           | 195        | +      | 10134    |
| tetur09g04920  | 8+1/1+1                               | 0_1_1                             | Y                           | 194        | -      | 10134    |
| tetur30g01430  | 8+1/2+1                               | 0_1_1                             | Y                           | 218        | -      | 10134    |
| tetur31g00680  | 8+1/1+1                               | 0_1_1                             | Y                           | 199        | -      | 10134    |
| tetur31g00780  | 8+1/1+1                               | 0_1_1                             | N                           | 177        | +      | 10134    |
| tetur31g00880  | 8+1/1+1                               | 0_1_1                             | Y                           | 199        | +      | 10134    |
| tetur31g00900  | 8+1/1+1                               | 0_1_1                             | Y                           | 199        | +      | 10134    |
| tetur31g00920  | 8+1/1+1                               | 0_1_1                             | Y                           | 199        | +      | 10134    |
| tetur02g11960  | 8+2/1+1                               | 0_2_1                             | Y                           | 218        | -      | 15855    |
| tetur37g00940  | 8+1/1+1+1                             | 0_2_1                             | Y                           | 213        | +      | 19721    |
| tetur04g05970  | 8+1/1+1                               | 0_2_1_1                           | Y                           | 193        | +      | 10107    |
| tetur04g05980  | 8+1/1+1                               | 0_2_1_1                           | Y                           | 187        | +      | 10107    |
| tetur04g06000  | 8+1/1+1                               | 0_2_1_1                           | Y                           | 194        | +      | 10107    |
| tetur04g06010  | 8/1+1                                 | 0_2_1_1                           | Y                           | 182        | -      | 10107    |
| tetur05g07070  | 8+1/1+1                               | 0_2_1_1                           | Y                           | 194        | +      | 10134    |
| tetur06g01610  | 8/1+1                                 | 0_2_1_1                           | Y                           | 167        | -      | 10107    |
| tetur06g01640  | 8+1/1+1                               | 2_1_1                             | Y                           | 184        | -      | 10134    |
| tetur06g02130  | 8+1/1+1                               | 0_2_1_1                           | Y                           | 183        | -      | 10107    |
| tetur06g02140  | 8+1/1+1                               | 0_2_1_1                           | Y                           | 187        | -      | 10107    |
| tetur06g02670  | 8/1+1                                 | 0_2_1_1                           | Y                           | 179        | -      | 10107    |
| tetur06g02940  | 2+1+1/2+2+1                           | 0_2_1_1                           | Y                           | 149        | +      | 10107    |
| tetur06g03020  | 8+2/1+1                               | 0_2_1_1                           | Y                           | 192        | -      | 10107    |
| tetur06g03030  | 3+1+1/1+2+1                           | 0_2_1_1                           | Y                           | 162        | -      | 10107    |
| tetur06g03070  | 3+1+1/2+2+1+1                         | 0_2_1_1                           | Y                           | 172        | +      | 10107    |
| tetur06g03090  | 8/1+1                                 | 0_2_1_1                           | Y                           | 165        | +      | 10107    |
| tetur06g03100  | 8+1/1+1                               | 0_2_1_1                           | Y                           | 184        | +      | 10107    |
| tetur06g03340  | 8+1/1+1                               | 0_2_1_1                           | Y                           | 185        | -      | 10107    |
| tetur06g03350  | 8/1+1                                 | 0_2_1_1                           | Y                           | 179        | +      | 10107    |
| tetur06g03360  | 8+1/1+1                               | 0_2_1_1                           | Y                           | 183        | -      | 10107    |
| tetur06g03370  | 8+1/1+1                               | 0_2_1_1                           | Y                           | 183        | +      | 10107    |
| tetur06g03440  | 8+1/1+1                               | 0_2_1_1                           | Y                           | 188        | -      | 10107    |
| tetur06g03530  | 8/2+2                                 | 0_2_1_1                           | Y                           | 181        | +      | 10107    |
| tetur06g03860  | 8+1/1+1                               | 0_2_1_1                           | Y                           | 191        | +      | 10134    |
| tetur06g06691  | 8+1/1+1                               | 0_2_1_1                           | Y                           | 172        | +      | 10107    |
| tetur07g03960  | 9+1/1+1                               | 0_2_1_1                           | Y                           | 201        | -      | 10134    |
| tetur07g03970  | 8+1/1+1                               | 0_2_1_1                           | Y                           | 199        | +      | 21421    |
| tetur11g05210  | 8+1/1+1                               | 0_2_1_1                           | Y                           | 187        | -      | 10107    |
| tetur11g05230  | 8+1/1+1                               | 0_2_1_1                           | Y                           | 187        | -      | 10107    |
| tetur16g03410  | 8+1/1+1                               | 0_2_1_1                           | Y                           | 184        | +      | 10107    |
| tetur16g03450  | 8+1/1+1                               | 0_2_1_1                           | Y                           | 184        | -      | 10107    |
| tetur16g03460  | 8+1/1+1                               | 0_2_1_1                           | Y                           | 184        | +      | 10107    |
| tetur174g00050 | 8+1/1+1                               | 0_2_1_1                           | Y                           | 199        | -      | 21421    |
| tetur18g00900  | 8+1/1+1                               | 0_2_1_1                           | Y                           | 200        | -      | 10107    |
| tetur21g03160  | 7/1+1                                 | 0_2_1_1                           | Y                           | 174        | -      | 10107    |
| tetur21g03190  | 8/1+1                                 | 0_2_1_1                           | Y                           | 171        | -      | 10107    |
| tetur21g03340  | 8/1+1                                 | 0_2_1_1                           | Y                           | 175        | +      | 10107    |
| tetur24g01030  | 8+1/3+1                               | 0_2_1_1                           | Y                           | 227        | +      | 10134    |
| tetur282g00020 | 8+1/1+1                               | 0_2_1_1                           | Y                           | 193        | +      | 10107    |

\**T. urticae* accession numbers can be accessed through the BOGAS genome portal (<http://bioinformatics.psb.ugent.be/webtools/bogas/>).

<sup>†</sup>Secondary structures were predicted using JPred3 (18); predicted  $\beta$  strands ("E") and helices ("H") were counted if they were at least 3 aa long and separated by at least 3 aa; "8+1/1+1" represents the typical repeated +1 topology  $\beta$ -barrel structure of lipocalins with a  $3_{10}$ -like and  $\alpha$ -helix at the N- and C-terminal ends, respectively.

<sup>‡</sup>The intron phase of each intron is separated by an underscore.

<sup>§</sup>S<sub>p</sub>: predicted with (Y) or without (N) a signal peptide using SignalP 3.0 (8).



**Table S3. Accession numbers of lipocalins used for phylogenetic analysis**

| Species                         | Taxonomy                             | Name                                                 | Accession no.  |
|---------------------------------|--------------------------------------|------------------------------------------------------|----------------|
| <i>Tetranychus urticae</i> (58) | Arachnida: Acari: Trombidiformes     | —                                                    | see Table S2   |
| <i>Ahrensia</i> sp.             | Alphaproteobacteria: Rhodobacterales | Outer membrane lipoprotein Blc                       | ZP_07375698.1  |
| <i>Homarus gammarus</i>         | Crustacea: Decapoda                  | Crustacyanin-A1                                      | P58989.1       |
| <i>H. gammarus</i>              | Crustacea: Decapoda                  | Crustacyanin-A2                                      | P80007.1       |
| <i>Debaromyces hansenii</i>     | Fungi: Ascomycota                    | —                                                    | XP_460369.1    |
| <i>Klebsiella pneumoniae</i>    | Proteobacteria: Enterobacterales     | Lipoprotein Blc                                      | ZP_06018160.1  |
| <i>Anopheles gambiae</i>        | Insecta: Diptera                     | Agam.Lip1                                            | XP_320076.4    |
| <i>Drosophila melanogaster</i>  | Insecta: Diptera                     | Neural lazarillo                                     | AAF51378.2     |
| <i>Drosophila melanogaster</i>  | Insecta: Diptera                     | Glial lazarillo                                      | NP_523727.2    |
| <i>D. melanogaster</i>          | Insecta: Diptera                     | Karl                                                 | AAK72697.1     |
| <i>Rhodnius prolixus</i>        | Insecta: Hemiptera                   | Biogenic amine-binding protein                       | AAO25746.1     |
| <i>R. prolixus</i>              | Insecta: Hemiptera                   | <i>Rhodnius</i> platelet aggregation inhibitor 3     | AAQ20817.1     |
| <i>R. prolixus</i>              | Insecta: Hemiptera                   | <i>Rhodnius</i> platelet aggregation inhibitor 4     | AAQ20818.1     |
| <i>R. prolixus</i>              | Insecta: Hemiptera                   | Nitrophorin-1                                        | Q26239.1       |
| <i>R. prolixus</i>              | Insecta: Hemiptera                   | Pallidipin salivary platelet aggregation inhibitor 1 | AAB09090.1     |
| <i>R. prolixus</i>              | Insecta: Hemiptera                   | Triabin-like lipocalin 1                             | NP_623787.1    |
| <i>Triatoma brasiliensis</i>    | Insecta: Hemiptera                   | Salivary triabin 1                                   | ABH09425.1     |
| <i>T. brasiliensis</i>          | Insecta: Hemiptera                   | Pallidipin precursor                                 | ABH09434.1     |
| <i>Triatoma pallidipennis</i>   | Insecta: Hemiptera                   | Pallidipin 2                                         | AAA30329.1     |
| <i>T. pallidipennis</i>         | Insecta: Hemiptera                   | Triabin                                              | CAA56540.1     |
| <i>Apis mellifera</i>           | Insecta: Hymenoptera                 | Amel_Lip1                                            | XP_392555.1    |
| <i>A. mellifera</i>             | Insecta: Hymenoptera                 | Amel_Lip2                                            | XP_623787.2    |
| <i>Harpegnathos saltator</i>    | Insecta: Hymenoptera                 | Apolipoprotein D                                     | EFN80483.1     |
| <i>Bombyx mori</i>              | Insecta: Lepidoptera                 | Bombyrin                                             | NP_001036872.1 |
| <i>B. mori</i>                  | Insecta: Lepidoptera                 | 32-kDa apolipoprotein                                | NP_001140192.1 |
| <i>Galleria mellonella</i>      | Insecta: Lepidoptera                 | Gallerin                                             | AAA85089.1     |
| <i>Hyphantria cunea</i>         | Insecta: Lepidoptera                 | Hyphantrin                                           | AAM18117.2     |
| <i>Lonomia obliqua</i>          | Insecta: Lepidoptera                 | Lipocalin 1 (biliprotein)                            | AAV91447.1     |
| <i>L. obliqua</i>               | Insecta: Lepidoptera                 | Lipocalin 4 (biliprotein)                            | AAV91423.1     |
| <i>Manduca sexta</i>            | Insecta: Lepidoptera                 | Insecticyanin 1                                      | P00305.1       |
| <i>M. sexta</i>                 | Insecta: Lepidoptera                 | Insecticyanin 2                                      | Q00630.1       |
| <i>Pieris brassicae</i>         | Insecta: Lepidoptera                 | Bilin-binding protein                                | CAA54063.1     |
| <i>Samia cynthia ricini</i>     | Insecta: Lepidoptera                 | Biliverdin-binding protein I                         | BAB85482.1     |
| <i>S. cynthia ricini</i>        | Insecta: Lepidoptera                 | Biliverdin-binding protein II                        | BAB84676.1     |
| <i>Shistocerca americana</i>    | Insecta: Orthoptera                  | Lazarillo                                            | CAA86216.1     |
| <i>Arabidopsis thaliana</i>     | Plantae: Brassicaceae                | —                                                    | AAM62904.1     |
| <i>Zea mays</i>                 | Plantae: Poaceae                     | —                                                    | NP_001140887.1 |
| <i>Oryza sativa</i>             | Plantae: Poaceae                     | —                                                    | NP_001047416.1 |
| <i>Bos taurus</i>               | Vertebrata: Mammalia                 | Apolipoprotein D                                     | DAA33372.1     |
| <i>Homo sapiens</i>             | Vertebrata: Mammalia                 | Apolipoprotein D                                     | NP_001638.1    |
| <i>Mus musculus</i>             | Vertebrata: Mammalia                 | Apolipoprotein D                                     | CAA57974.1     |

**Table S4. Classification of *T. urticae* MFS transporter genes (from OrthoMCL 10032, 10082, and 10236) determined by BLASTp in the Transporter Classification DataBase (20)**

| Tetur ID*      | Length, aa | TM <sup>†</sup> | S <sub>p</sub> <sup>‡</sup> | TCID name of best blastp hit at TCDB <sup>§</sup>      | TCID        | E-value | TCDB family                                   |
|----------------|------------|-----------------|-----------------------------|--------------------------------------------------------|-------------|---------|-----------------------------------------------|
| <b>10236</b>   |            |                 |                             |                                                        |             |         |                                               |
| tetur04g02320  | 505        | 10              | N                           | Sialin                                                 | 2.A.1.14.10 | e-52    | Anion:Cation Symporter (ACS) family           |
| tetur05g04460  | 538        | 10              | N                           | Brain synaptic vesicle anion:Na <sup>+</sup> symporter | 2.A.1.14.13 | e-42    | ACS family                                    |
| tetur08g06320  | 530        | 11              | N                           | Brain synaptic vesicle anion:Na <sup>+</sup> symporter | 2.A.1.14.13 | e-43    | ACS family                                    |
| tetur08g06330  | 508        | 12              | N                           | Sialin                                                 | 2.A.1.14.10 | e-52    | ACS family                                    |
| tetur08g06340  | 527        | 11              | N                           | Sialin                                                 | 2.A.1.14.10 | e-52    | ACS family                                    |
| tetur08g06350  | 512        | 11              | N                           | Sialin                                                 | 2.A.1.14.10 | e-46    | ACS family                                    |
| tetur08g06360  | 503        | 11              | N                           | Sialin                                                 | 2.A.1.14.10 | e-46    | ACS family                                    |
| tetur08g06370  | 508        | 9               | N                           | Sialin                                                 | 2.A.1.14.10 | e-55    | ACS family                                    |
| tetur08g06410  | 512        | 11              | N                           | Sialin                                                 | 2.A.1.14.10 | e-57    | ACS family                                    |
| tetur08g06870  | 529        | 8               | N                           | Sialin                                                 | 2.A.1.14.10 | e-58    | ACS family                                    |
| tetur08g06890  | 527        | 9               | N                           | Sialin                                                 | 2.A.1.14.10 | e-61    | ACS family                                    |
| tetur09g02840  | 489        | 12              | N                           | Sialin                                                 | 2.A.1.14.10 | e-43    | ACS family                                    |
| tetur17g01270  | 522        | 11              | N                           | Sialin                                                 | 2.A.1.14.10 | e-54    | ACS family                                    |
| tetur17g01300  | 530        | 10              | N                           | Sialin                                                 | 2.A.1.14.10 | e-50    | ACS family                                    |
| tetur05g04570  | 353        | 5               | N                           | Sialin                                                 | 2.A.1.14.10 | e-27    | ACS family                                    |
| tetur05g04590  | 498        | 11              | N                           | Sialin                                                 | 2.A.1.14.10 | e-36    | ACS family                                    |
| tetur05g04600  | 280        | 6               | N                           | brain synaptic vesicle anion:Na <sup>+</sup> symporter | 2.A.1.14.13 | e-17    | ACS family                                    |
| tetur08g06400  | 447        | 7               | N                           | brain synaptic vesicle anion:Na <sup>+</sup> symporter | 2.A.1.14.13 | e-45    | ACS family                                    |
| tetur60g00010  | 240        | 6               | N                           | Sialin                                                 | 2.A.1.14.10 | e-28    | ACS family                                    |
| tetur533g00010 | 265        | 5               | N                           | Sialin                                                 | 2.A.1.14.10 | e-32    | ACS family                                    |
| <b>10082</b>   |            |                 |                             |                                                        |             |         |                                               |
| tetur01g00770  | 486        | 12              | N                           | Na <sup>+</sup> -dependent glucose transporter         | 2.A.1.7.4   | e-20    | Fucose: H <sup>+</sup> Symporter (FHS) family |
| tetur01g06570  | 444        | 12              | N                           | Na <sup>+</sup> -dependent glucose transporter         | 2.A.1.7.4   | e-13    | FHS family                                    |
| tetur01g06580  | 441        | 12              | N                           | Na <sup>+</sup> -dependent glucose transporter         | 2.A.1.7.4   | e-22    | FHS family                                    |
| tetur01g06600  | 441        | 10              | N                           | Na <sup>+</sup> -dependent glucose transporter         | 2.A.1.7.4   | e-26    | FHS family                                    |
| tetur01g08660  | 463        | 12              | N                           | Na <sup>+</sup> -dependent glucose transporter         | 2.A.1.7.4   | e-18    | FHS family                                    |
| tetur01g10420  | 457        | 10              | N                           | Na <sup>+</sup> -dependent glucose transporter         | 2.A.1.7.4   | e-21    | FHS family                                    |
| tetur01g10430  | 457        | 10              | N                           | Na <sup>+</sup> -dependent glucose transporter         | 2.A.1.7.4   | e-20    | FHS family                                    |
| tetur01g15760  | 460        | 12              | N                           | Na <sup>+</sup> -dependent glucose transporter         | 2.A.1.7.4   | e-24    | FHS family                                    |
| tetur02g11610  | 453        | 12              | N                           | Na <sup>+</sup> -dependent glucose transporter         | 2.A.1.7.4   | e-16    | FHS family                                    |
| tetur02g13340  | 467        | 12              | N                           | Na <sup>+</sup> -dependent glucose transporter         | 2.A.1.7.4   | e-09    | FHS family                                    |
| tetur04g03830  | 452        | 12              | N                           | Na <sup>+</sup> -dependent glucose transporter         | 2.A.1.7.4   | e-16    | FHS family                                    |
| tetur04g07010  | 458        | 12              | N                           | Na <sup>+</sup> -dependent glucose transporter         | 2.A.1.7.4   | e-21    | FHS family                                    |
| tetur05g05100  | 443        | 12              | N                           | Na <sup>+</sup> -dependent glucose transporter         | 2.A.1.7.4   | e-22    | FHS family                                    |
| tetur07g06710  | 443        | 12              | N                           | Na <sup>+</sup> -dependent glucose transporter         | 2.A.1.7.4   | e-19    | FHS family                                    |
| tetur07g06730  | 448        | 12              | N                           | Na <sup>+</sup> -dependent glucose transporter         | 2.A.1.7.4   | e-21    | FHS family                                    |
| tetur07g06740  | 447        | 10              | N                           | Na <sup>+</sup> -dependent glucose transporter         | 2.A.1.7.4   | e-24    | FHS family                                    |
| tetur10g00280  | 136        | 2               | N                           | Putative vanillate porter                              | 2.A.1.15.6  | 0.0025  | FHS family                                    |
| tetur10g00320  | 453        | 11              | N                           | Na <sup>+</sup> -dependent glucose transporter         | 2.A.1.7.4   | e-17    | FHS family                                    |
| tetur13g02590  | 442        | 10              | N                           | Na <sup>+</sup> -dependent glucose transporter         | 2.A.1.7.4   | e-05    | FHS family                                    |
| tetur13g02600  | 442        | 12              | N                           | Na <sup>+</sup> -dependent glucose transporter         | 2.A.1.7.4   | e-10    | FHS family                                    |
| tetur13g02620  | 442        | 12              | N                           | Na <sup>+</sup> -dependent glucose transporter         | 2.A.1.7.4   | e-14    | FHS family                                    |
| tetur15g00220  | 465        | 12              | N                           | Na <sup>+</sup> -dependent glucose transporter         | 2.A.1.7.4   | e-22    | FHS family                                    |
| tetur18g01050  | 445        | 10              | N                           | Na <sup>+</sup> -dependent glucose transporter         | 2.A.1.7.4   | e-19    | FHS family                                    |
| tetur19g02710  | 455        | 11              | N                           | Na <sup>+</sup> -dependent glucose transporter         | 2.A.1.7.4   | e-12    | FHS family                                    |
| tetur21g00030  | 475        | 12              | N                           | Na <sup>+</sup> -dependent glucose transporter         | 2.A.1.7.4   | e-25    | FHS family                                    |
| tetur21g00050  | 475        | 12              | N                           | Na <sup>+</sup> -dependent glucose transporter         | 2.A.1.7.4   | e-21    | FHS family                                    |
| tetur21g00410  | 458        | 10              | N                           | Na <sup>+</sup> -dependent glucose transporter         | 2.A.1.7.4   | e-17    | FHS family                                    |
| tetur21g00420  | 461        | 10              | N                           | Na <sup>+</sup> -dependent glucose transporter         | 2.A.1.7.4   | e-22    | FHS family                                    |
| tetur21g00500  | 461        | 10              | N                           | Na <sup>+</sup> -dependent glucose transporter         | 2.A.1.7.4   | e-18    | FHS family                                    |
| tetur21g00590  | 142        | 4               | N                           | E-protein viroporin                                    | 1.A.65.1.2  | 0.0685  | E-protein viroporin                           |
| tetur22g02590  | 449        | 12              | N                           | Na <sup>+</sup> -dependent glucose transporter         | 2.A.1.7.4   | e-13    | FHS family                                    |
| tetur24g01860  | 448        | 12              | N                           | Na <sup>+</sup> -dependent glucose transporter         | 2.A.1.7.4   | e-15    | FHS family                                    |
| tetur24g02320  | 449        | 12              | N                           | Na <sup>+</sup> -dependent glucose transporter         | 2.A.1.7.4   | e-09    | FHS family                                    |
| tetur39g00620  | 444        | 12              | N                           | Na <sup>+</sup> -dependent glucose transporter         | 2.A.1.7.4   | e-14    | FHS family                                    |
| tetur40g00020  | 484        | 12              | N                           | Na <sup>+</sup> -dependent glucose transporter         | 2.A.1.7.4   | e-37    | FHS family                                    |
| tetur40g00030  | 436        | 12              | N                           | Na <sup>+</sup> -dependent glucose transporter         | 2.A.1.7.4   | e-20    | FHS family                                    |

Table S4. Cont.

| Tetur ID*     | Length, aa | TM <sup>†</sup> | S <sub>p</sub> <sup>‡</sup> | TCID name of best blastp hit at TCDB <sup>§</sup>            | TCID        | E-value | TCDB family                                                 |
|---------------|------------|-----------------|-----------------------------|--------------------------------------------------------------|-------------|---------|-------------------------------------------------------------|
| 10032         |            |                 |                             |                                                              |             |         |                                                             |
| tetur02g07750 | 490        | 11              | N                           | Solute carrier family 46, member 3                           | 2.A.1.50.3  | 0.0001  | PCFT/HCP family                                             |
| tetur02g07790 | 476        | 11              | N                           | Solute carrier family 46, member 3                           | 2.A.1.50.3  | 0.0033  | PCFT/HCP family                                             |
| tetur02g07920 | 490        | 11              | N                           | Solute carrier family 46, member 3                           | 2.A.1.50.3  | 0.0002  | PCFT/HCP family                                             |
| tetur02g10410 | 559        | 12              | N                           | Quinolone resistance protein norA                            | 2.A.1.2.10  | 0.0117  | Drug:H <sup>+</sup> Antiporter-1 (DHA1) family              |
| tetur03g00780 | 507        | 11              | N                           | Tetracycline:H <sup>+</sup> antiporter                       | 2.A.1.2.4   | 0.3359  | DHA1 family                                                 |
| tetur03g02680 | 508        | 10              | N                           | Solute carrier family 46, member 3                           | 2.A.1.50.3  | e-06    | PCFT/HCP family                                             |
| tetur03g02740 | 507        | 11              | N                           | Thymic stromal cotransporter, TSCOT                          | 2.A.1.50.2  | e-05    | PCFT/HCP family                                             |
| tetur03g02780 | 506        | 10              | N                           | TSCOT                                                        | 2.A.1.50.2  | 0.0002  | PCFT/HCP family                                             |
| tetur03g02800 | 512        | 12              | N                           | Tetracycline:H <sup>+</sup> antiporter                       | 2.A.1.2.4   | e-05    | DHA1 family                                                 |
| tetur03g02880 | 508        | 10              | N                           | Proton-coupled folate transporter/Heme carrier protein       | 2.A.1.50.1  | e-05    | PCFT/HCP family                                             |
| tetur03g02890 | 508        | 10              | N                           | Tetracycline:H <sup>+</sup> antiporter                       | 2.A.1.2.4   | e-05    | DHA1 family                                                 |
| tetur03g04410 | 574        | 12              | N                           | Solute carrier family 46, member 3                           | 2.A.1.50.3  | e-05    | PCFT/HCP family                                             |
| tetur04g02440 | 491        | 10              | N                           | Solute carrier family 46, member 3                           | 2.A.1.50.3  | 0.0002  | PCFT/HCP family                                             |
| tetur04g06740 | 550        | 12              | N                           | Solute carrier family 46, member 3                           | 2.A.1.50.3  | 0.0001  | PCFT/HCP family                                             |
| tetur06g05250 | 599        | 10              | N                           | Tetracycline-specific exporter, TetA39 (most like 2.A.1.2.4) | 2.A.1.2.38  | 0.0044  | DHA1 family                                                 |
| tetur08g00460 | 496        | 12              | N                           | Solute carrier family 46, member 3                           | 2.A.1.50.3  | e-05    | PCFT/HCP family                                             |
| tetur08g00470 | 501        | 11              | N                           | Proton-coupled folate transporter/Heme carrier protein       | 2.A.1.50.1  | e-09    | PCFT/HCP family                                             |
| tetur08g00480 | 534        | 10              | N                           | Proton-coupled folate transporter/Heme carrier protein       | 2.A.1.50.1  | e-05    | PCFT/HCP family                                             |
| tetur08g02850 | 617        | 11              | N                           | TSCOT                                                        | 2.A.1.50.2  | e-06    | PCFT/HCP family                                             |
| tetur08g04870 | 511        | 11              | N                           | Solute carrier family 46, member 3                           | 2.A.1.50.3  | 0.0003  | PCFT/HCP family                                             |
| tetur09g02400 | 492        | 11              | N                           | Proton-coupled folate transporter/Heme carrier protein       | 2.A.1.50.1  | 0.0502  | PCFT/HCP family                                             |
| tetur09g02410 | 525        | 11              | N                           | Glycolipid translocase (floppase) Spr1816/Spr1817            | 3.A.1.142.1 | 0.0541  | Glycolipid Flippase (G.L.Flippase) family                   |
| tetur09g02420 | 510        | 10              | N                           | Cu <sup>+</sup> /Ag <sup>+</sup> efflux pump                 | 2.A.6.1.4   | 0.0682  | Heavy Metal Efflux (HME) family                             |
| tetur09g02430 | 525        | 10              | N                           | Solute carrier family 46, member 3                           | 2.A.1.50.3  | 0.0109  | PCFT/HCP Family                                             |
| tetur11g00550 | 537        | 8               | N                           | (Mono- and divalent organocation):H <sup>+</sup> antiporter. | 2.A.1.3.4   | 0.0017  | Drug:H <sup>+</sup> Antiporter-2 (14 Spanner) (DHA2) family |
| tetur11g05100 | 501        | 11              | N                           | TSCOT                                                        | 2.A.1.50.2  | e-05    | PCFT/HCP family                                             |
| tetur11g05110 | 500        | 11              | N                           | TSCOT                                                        | 2.A.1.50.2  | 0.0001  | PCFT/HCP family                                             |
| tetur11g05410 | 506        | 10              | N                           | Solute carrier family 46, member 3                           | 2.A.1.50.3  | e-05    | PCFT/HCP family                                             |
| tetur11g06110 | 528        | 9               | N                           | TSCOT                                                        | 2.A.1.50.2  | e-06    | PCFT/HCP family                                             |
| tetur13g03400 | 502        | 10              | N                           | Solute carrier family 46, member 3                           | 2.A.1.50.3  | e-05    | PCFT/HCP family                                             |
| tetur14g02020 | 564        | 12              | N                           | TSCOT                                                        | 2.A.1.50.2  | 0.0014  | PCFT/HCP family                                             |
| tetur15g01050 | 489        | 12              | N                           | Solute carrier family 46, member 3                           | 2.A.1.50.3  | 0.0131  | PCFT/HCP family                                             |
| tetur16g01660 | 566        | 12              | N                           | MFS permease of unknown function                             | 2.A.1.66.1  | 0.007   | Unidentified Major Facilitator-15 (UMF15) Family            |
| tetur16g03200 | 499        | 8               | N                           | TetA42 from a deep terrestrial subsurface bacterium          | 2.A.1.2.41  | 0.0228  | DHA1 family                                                 |
| tetur16g03270 | 497        | 10              | N                           | Solute carrier family 45, member 4                           | 2.A.2.4.7   | 0.0078  | GPH:Cation Symporter family                                 |
| tetur17g03580 | 499        | 12              | N                           | TSCOT                                                        | 2.A.1.50.3  | e-10    | PCFT/HCP family                                             |
| tetur17g00880 | 606        | 12              | N                           | TSCOT                                                        | 2.A.1.50.2  | 0.0375  | PCFT/HCP family                                             |
| tetur17g00890 | 541        | 12              | N                           | Solute carrier family 45, member 4                           | 2.A.1.50.3  | 0.0051  | PCFT/HCP family                                             |
| tetur20g03210 | 501        | 11              | N                           | Tetracycline:H <sup>+</sup> antiporter                       | 2.A.1.2.4   | 0.0021  | DHA1 family                                                 |
| tetur30g01490 | 471        | 11              | N                           | Solute carrier family 46, member 3                           | 2.A.1.50.3  | 0.0002  | PCFT/HCP family                                             |
| tetur30g02070 | 549        | 12              | N                           | Proton-coupled folate transporter/Heme carrier protein       | 2.A.1.50.1  | 0.0256  | PCFT/HCP family                                             |
| tetur02g07760 | 432        | 10              | Y                           | Solute carrier family 46, member 3                           | 2.A.1.50.3  | 0.0008  | PCFT/HCP family                                             |
| tetur03g02670 | 372        | 7               | N                           | TSCOT                                                        | 2.A.1.50.2  | 0.0002  | PCFT/HCP family                                             |
| tetur03g02770 | 166        | 4               | N                           | —                                                            | —           | —       | —                                                           |
| tetur03g02820 | 342        | 10              | N                           | TSCOT                                                        | 2.A.1.50.2  | 0.0003  | PCFT/HCP PCFT/HCP family                                    |
| tetur03g04360 | 194        | 11              | N                           | Solute carrier family 46, member 3                           | 2.A.1.50.3  | 0.0036  | PCFT/HCP PCFT/HCP family                                    |

**Table S4. Cont.**

| Tetur ID*      | Length, aa | TM <sup>†</sup> | S <sub>p</sub> <sup>‡</sup> | TCID name of best blastp hit at TCDB <sup>§</sup> | TCID       | E-value | TCDB family                               |
|----------------|------------|-----------------|-----------------------------|---------------------------------------------------|------------|---------|-------------------------------------------|
| tetur03g04370  | 157        | 3               | N                           | Tetracycline resistance protein OS...             | 2.A.1.2.41 | 0.8993  | DHA1 family                               |
| tetur03g04390  | 219        | 6               | N                           | Solute carrier family 46, member 3                | 2.A.1.50.3 | 0.0012  | PCFT/HCP PCFT/HCP family                  |
| tetur11g05550  | 508        | 11              | N                           | Solute carrier family 46, member 3                | 2.A.1.50.3 | 0.003   | PCFT/HCP PCFT/HCP family                  |
| tetur16g03180  | 483        | 9               | N                           | Solute carrier family 46, member 3                | 2.A.1.50.3 | 0.0026  | PCFT/HCP PCFT/HCP family                  |
| tetur17g03650  | 307        | 4               | N                           | Lipopolysaccharide (colanic acid) exporter, WzxC  | 2.A.66.2.7 | 0.8899  | Polysaccharide Transport (PST) family     |
| tetur46g00180  | 355        | 8               | N                           | Inner membrane protein YqcE                       | 2.A.1.52.2 | 0.3687  | Unknown Major Facilitator-8 (UMF8) family |
| tetur623g00010 | 141        | 4               | N                           | Solute carrier family 46, member 3                | 2.A.1.50.3 | 0.0012  | PCFT/HCP PCFT/HCP family                  |

\**T. urticae* accession numbers can be accessed through the BOGAS genome portal (<http://bioinformatics.psb.ugent.be/webtools/bogas/>).

<sup>†</sup>Transmembrane regions were predicted using TMHMM Server v. 2.0 (<http://www.cbs.dtu.dk/services/TMHMM/>).

<sup>‡</sup>S<sub>p</sub>: Signal peptides were predicted using SignalP 3.0 (8).

<sup>§</sup>TCID, Transporter Class ID at the Transporter Class DataBase (TCDB) (20).

**Table S5. Differentially expressed transcription factors in MR-VP, MAR-AB, and Tomato-5G**

| Tetur ID*            | OrthoMCL cluster   | PFAM domain (name) $\leq e^{-5}$                                              | $\log_2(\text{FC})$ |              |              |
|----------------------|--------------------|-------------------------------------------------------------------------------|---------------------|--------------|--------------|
|                      |                    |                                                                               | MR-VP               | MAR-AB       | Tomato-5G    |
| tetur08g07430        | arthro11677        | PF00010.21 (Helix-loop-helix DNA-binding domain), PF08447.6 (PAS fold domain) | 0.00                | 0.00         | -1.22        |
| tetur08g07600        | arthro13628        | PF00010.21 (Helix-loop-helix DNA-binding domain), PF08447.6 (PAS fold domain) | 0.00                | -1.01        | 0.00         |
| <b>tetur03g03150</b> | <b>arthro13720</b> | <b>PF00010.21 (Helix-loop-helix DNA-binding domain)</b>                       | <b>-1.08</b>        | <b>-1.26</b> | <b>-1.67</b> |
| tetur01g11390        | arthro18772        | PF00010.21 (Helix-loop-helix DNA-binding domain)                              | 1.62                | 0.00         | 1.96         |
| tetur01g11460        | arthro18772        | PF00010.21 (Helix-loop-helix DNA-binding domain)                              | 1.65                | 0.00         | 1.89         |
| tetur01g11400        | arthro18772        | PF00010.21 (Helix-loop-helix DNA-binding domain)                              | 0.00                | -1.33        | -1.09        |
| tetur07g01420        | Singleton          | PF00010.21 (Helix-loop-helix DNA-binding domain)                              | 1.61                | 0.00         | 0.00         |
| tetur02g09640        | arthro13477        | PF00046.24 (Homeobox)                                                         | 0.00                | -1.21        | 0.00         |
| tetur09g01820        | arthro20299        | PF00046.24 (Homeobox), PF00157.12 (Pou domain)                                | 0.00                | 0.00         | -1.03        |
| tetur01g13830        | arthro21308        | PF00046.24 (Homeobox)                                                         | 0.00                | 0.00         | -1.17        |
| <b>tetur24g02450</b> | <b>Singleton</b>   | <b>PF00046.24 (Homeobox)</b>                                                  | <b>1.77</b>         | <b>1.29</b>  | <b>1.78</b>  |
| tetur21g02710        | Singleton          | PF00046.24 (Homeobox)                                                         | 0.00                | -2.40        | 0.00         |
| tetur01g09330        | arthro10817        | PF00076.17 (RNA recognition motif 1)                                          | 0.00                | -1.19        | 0.00         |
| <b>tetur36g00260</b> | <b>arthro18765</b> | <b>PF00104.25 (Ligand-binding domain of nuclear hormone receptor)</b>         | <b>1.08</b>         | <b>1.80</b>  | <b>1.26</b>  |
| tetur03g02550        | Singleton          | PF00104.25 (Ligand-binding domain of nuclear hormone receptor)                | -4.16               | 0.00         | 0.00         |
| tetur34g00430        | Singleton          | PF00105.13 (Zinc finger, C4 type)                                             | 0.00                | 0.00         | -1.04        |
| tetur03g03610        | arthro21359        | PF00170.16 (bZIP transcription factor)                                        | 0.00                | 0.00         | 1.15         |
| tetur02g02610        | arthro13949        | PF00250.13 (Fork-head domain)                                                 | 1.05                | 0.00         | 1.36         |
| tetur14g02480        | Singleton          | PF00250.13 (Fork-head domain)                                                 | 0.00                | 0.00         | -1.06        |
| tetur13g04490        | Singleton          | PF00412.17 (Lim domain)                                                       | 1.12                | 0.00         | 0.00         |
| tetur18g00570        | arthro17249        | PF00628.24 (PHD finger)                                                       | 1.33                | 0.00         | 0.00         |
| tetur18g00520        | arthro17249        | PF00628.24 (PHD finger)                                                       | 0.00                | -1.21        | 0.00         |
| <b>tetur07g01800</b> | <b>arthro15823</b> | <b>PF00651.26 (BTB/POZ domain)</b>                                            | <b>1.20</b>         | <b>1.08</b>  | <b>1.24</b>  |
| tetur11g00680        | Singleton          | PF00651.26 (BTB/POZ domain)                                                   | -1.26               | 0.00         | 0.00         |
| tetur11g01870        | Singleton          | PF00651.26 (BTB/POZ domain)                                                   | 0.00                | -1.14        | 0.00         |
| tetur41g00270        | Singleton          | PF00751.13 (DM DNA-binding domain)                                            | 0.00                | 0.00         | -1.02        |
| tetur03g01600        | arthro14230        | PF08447.6 (PAS fold domain), PF00989.19 (PAS domain)                          | 0.00                | -1.01        | 0.00         |
| tetur09g05790        | Singleton          | PF01388.16 (ARID/BRIGHT DNA-binding domain)                                   | 0.00                | 1.07         | 1.02         |
| tetur21g01360        | arthro18850        | PF01426.13 (Bromo adjacent homology)                                          | 0.00                | 1.22         | 0.00         |
| tetur35g00700        | Singleton          | PF02257.10 RFX (DNA-binding domain)                                           | 0.00                | 0.00         | -1.00        |
| tetur08g07670        | Singleton          | PF03166.9 (MAD homology 2 domain)                                             | 0.00                | 1.16         | 1.25         |
| tetur05g03220        | arthro18519        | PF05920.6 (Homeobox KN domain)                                                | 0.00                | 0.00         | -1.17        |
| tetur01g09160        | arthro15791        | PF07716.10 (Basic Leucine Zipper Domain)                                      | 0.00                | -1.14        | 0.00         |
| tetur27g00310        | arthro13959        | PF10163.4 (Transcription factor e(y)2)                                        | 0.00                | -1.03        | 0.00         |
| tetur12g02760        | arthro10838        | PF13465.1 (Zinc-finger double domain)                                         | -1.39               | 0.00         | 0.00         |
| tetur01g07180        | arthro21295        | PF13465.1 (Zinc-finger double domain)                                         | 0.00                | -1.26        | 0.00         |
| tetur04g03720        | arthro21379        | PF13465.1 (Zinc-finger double domain)                                         | 0.00                | 0.00         | -1.81        |
| tetur01g09970        | Singleton          | PF13465.1 (Zinc-finger double domain)                                         | 0.00                | 0.00         | -1.03        |
| tetur03g05420        | Singleton          | PF13551.1 (Winged helix-turn helix)                                           | 0.00                | -1.40        | -1.26        |
| tetur30g00520        | Singleton          | PF13815.1 (Iguana/Dzip1-like DAZ-interacting protein N-terminal)              | 0.00                | 1.10         | 0.00         |
| tetur07g07990        | arthro12151        | PF13873.1 (Myb/SANT-like DNA-binding domain)                                  | 0.00                | 0.00         | -1.35        |
| tetur34g00350        | arthro12151        | PF13873.1 (Myb/SANT-like DNA-binding domain)                                  | 0.00                | 0.00         | -1.35        |
| tetur46g00100        | arthro10157        | —                                                                             | 0.00                | 0.00         | 1.37         |
| tetur86g00030        | arthro10157        | —                                                                             | -1.34               | 0.00         | -1.01        |
| tetur01g08230        | arthro10157        | —                                                                             | -1.29               | 0.00         | 0.00         |
| tetur01g08270        | arthro10157        | —                                                                             | -1.27               | 0.00         | 0.00         |
| tetur86g00020        | arthro10157        | —                                                                             | -1.34               | 0.00         | 0.00         |
| tetur12g02560        | arthro15835        | —                                                                             | 0.00                | 0.00         | -1.28        |

Transcription factors differentially expressed in MR-VP, MAR-AB, and Tomato-5G are indicated in boldface type.

\**T. urticae* accession numbers can be accessed through the BOGAS genome portal (<http://bioinformatics.psb.ugent.be/webtools/bogas/>); Tetur IDs shaded in gray are nuclear receptors according to ref. 2, and Tetur IDs indicated in boldface type are differentially expressed in MR-VP, MAR-AB, and Tomato-5G.

**Table S6. Primers used in this study**

| Tetur ID      | Gene name/family       | Primer                       | Sequence, 5'-3'                                        | qPCR product, nt | $T_m$ , °C     |
|---------------|------------------------|------------------------------|--------------------------------------------------------|------------------|----------------|
| tetur18g03590 | Ribosomal protein 49   | 18g03590_q_F<br>18g03590_q_R | CTTCAAGCGGCATCAGAGC<br>CGCATCTGACCCTTGAACCTC           | 105              | 62.19<br>62.09 |
| tetur03g09480 | Actin                  | 03g09480_q_F<br>03g09480_q_R | GCCATCCTTCGTTTGGATTGGCT<br>TCTCGGACAATTTCTCGCTCAGCA    | 113              | 69.94<br>69.43 |
| tetur03g04990 | CYP392D2               | 03g04990_q_F<br>03g04990_q_R | TTTAAATCAGCACAGGGTAAATTG<br>CACTAACTTGCTTCATGTTGTGTCTT | 152              | 60.58<br>60.92 |
| tetur03g05070 | CYP392D8               | 03g05070_q_F<br>03g05070_q_R | TGAGCTCAGAAACGCGAAT<br>CTCGATTTTCATGGGTTGCTT           | 100              | 59.69<br>60.07 |
| tetur03g05110 | CYP392D10              | 03g05110_q_F<br>03g05110_q_R | ATTGGATTCGAACGTCAACC<br>GTAAATTAAGAGGAGTGATTGTTGCT     | 109              | 59.80<br>58.48 |
| tetur06g04520 | CYP392A16              | 06g04520_q_F<br>06g04520_q_R | AAATACCGAGGTCGGACGTA<br>AAGCACTTTTCAATCTGGTCAC         | 117              | 59.45<br>59.69 |
| tetur06g04970 | Short chain reductases | 06g04970_q_F<br>06g04970_q_R | TGCTGGTCTTCATGTTTCC<br>TGACTATGTTTCTCAGATTTGT          | 146              | 61.05<br>60.06 |
| tetur29g00220 | TuGSTd14               | 29g00220_q_F<br>29g00220_q_R | CTTTGGCAGATCTCACCGTAA<br>GTCAGCGTAGTTAGTTTCCAGTTG      | 119              | 60.26<br>59.43 |
| tetur02g09840 | Glycosyltransferases   | 02g09840_q_F<br>02g09840_q_R | GTTTACTCAGCAAATCCTCTTGC<br>TCTCGGTAATTTTCCAATAATCTC    | 104              | 59.45<br>59.02 |
| tetur16g03220 | MFS                    | 16g03220_q_F<br>16g03220_q_R | ATATCCGTGATCAGTGCAACA<br>AATTGGAATATTGGCACAGC          | 140              | 59.02<br>59.10 |
| tetur01g00490 | ID-RCD                 | 01g04900_q_F<br>01g04900_q_R | CCGAAAAGCTCACCAACATTCAAG<br>CGTTTCAAGTCATCGGGAAGAAAG   | 81               | 66.04<br>65.20 |
| tetur13g04550 | ID-RCD                 | 13g04550_q_F<br>13g04550_q_R | CTGGCAAGCCAATGCTTTA<br>ACCTCTGAGGAATCTTTCACCA          | 100              | 59.96<br>60.11 |
| tetur01g00490 | ID-RCD                 | 01g00490_s_F<br>01g00490_s_R | CCTTTGTCTTGTTCATTACCG<br>TGGATCAATGGCGACTGTG           | 712              | 59.92<br>61.71 |
| tetur04g08620 | ID-RCD                 | 04g08620_s_F<br>04g08620_s_R | TCCGATCCCATTATGTCTC<br>CTGGTAGGCTCAATACCAAGTG          | 686              | 59.85<br>58.79 |
| tetur06g00460 | ID-RCD                 | 06g00460_s_F<br>06g00460_s_R | GAAAGACCTGGTAAATTCGTTG<br>TCAGGATCAATCCCAAAGTG         | 680              | 57.80<br>59.92 |
| tetur07g02040 | ID-RCD                 | 07g02040_s_F<br>07g02040_s_R | GCCTGTGATTACTTCTCCTTG<br>GGCCACATTAATTTGACCTATG        | 737              | 59.32<br>62.63 |
| tetur07g05940 | ID-RCD                 | 07g05940_s_F<br>07g05940_s_R | CCATTCGAAAGATCCATTG<br>GCACTGTAACCATTACCTTCTGG         | 660              | 60.27<br>59.94 |
| tetur12g04671 | ID-RCD                 | 12g04671_s_F<br>12g04671_s_R | GATCGTACAATAGTTGATTGTGCTC<br>TCTGAAACCATTTCTGTGG       | 624              | 59.14<br>59.96 |
| tetur19g03360 | ID-RCD                 | 19g03360_s_F<br>19g03360_s_R | CGTTATTGTTACAGCCGATCC<br>GGATCGATACCGAATATCATGG        | 831              | 59.49<br>60.38 |
| tetur20g01160 | ID-RCD                 | 20g01160_s_F<br>20g01160_s_R | CGTACTGATTAGCCACCAATCC<br>AGATGTCATTCCTCGGTTG          | 730              | 60.74<br>59.93 |
| tetur20g01790 | ID-RCD                 | 20g01790_s_F<br>20g01790_s_R | TTGGCTGTTACTTTTGGTGAC<br>GAACCAAAGTATCCTGTTTCTCG       | 812              | 57.80<br>59.19 |
| tetur28g01250 | ID-RCD                 | 28g01250_s_F<br>28g01250_s_R | TTTCCAATCATTAGAGAGACC<br>TGTTAAAGTAGTGACTGTTGGATCG     | 710              | 58.38<br>59.65 |
| tetur44g00140 | ID-RCD                 | 44g00140_s_F<br>44g00140_s_R | TGAACCCAGGCCTATTGATG<br>TCCGAGTGTAATGATTCTTGT          | 850              | 60.85<br>57.69 |
